# Supplementary material
Source: PubMed Central journal article supplement (PMC5592720)

## Supporting Information

### Characterization of *in Vitro* ADME Properties of Diosgenin and Dioscin from *Dioscorea villosa*

Vamshi K. Manda<sup>1</sup>, Bharathi Avula<sup>1</sup>, Zulfiqar Ali<sup>1</sup>, Yan-Hong Wong<sup>1</sup>, Troy J. Smillie<sup>1</sup>, Ikhlas A. Khan<sup>1,2</sup>, Shabana I. Khan<sup>1,2</sup>

#### Affiliations

<sup>1</sup>National Center for Natural Products Research, <sup>2</sup>Department of Pharmacognosy, School of Pharmacy, The University of Mississippi, University, MS, USA

#### Correspondence

*Shabana I. Khan*

National Center for Natural Products Research, School of Pharmacy

University of Mississippi

MS 38677, USA

Phone: +1 662 915 1041

Fax: +1 662 915 7062

eMail: skhan@olemiss.edu

## Methods and Results:

### Determination of diosgenin and dioscin cytotoxicity in Caco-2 cells:

To determine if diosgenin and dioscin were cytotoxic to Caco-2 cells, CellTiter 96<sup>®</sup> AQueous one solution cell proliferation assay (Promega Corporation) was used according to the manufacturers guidelines. Briefly, 20,000 cells per well in 100  $\mu$ L DMEM media were seeded in 96-well plates. After 24h, diosgenin (200  $\mu$ M), dioscin (100  $\mu$ M), and positive control Triton X-100 (0.25%) were added. After 2h incubation at 37 °C, 20  $\mu$ L of MTS [3-(4,5- methylthiazol-2-yl)-5-(3-carboxymethoxyphenyl)-2-(4-sulfohenyl)-2H-tetrazolium salt] dye was added and incubated for 1h at 37 °C. After 1h, the absorbance of the plate was read at 490 nm on a Spectramax M5 plate reader. Percent cell viability was calculated compared to the control. No cytotoxicity was observed with either diosgenin (200  $\mu$ M) or dioscin (100  $\mu$ M) in Caco-2 cells, while Triton X-100 (0.25%) showed significant cytotoxicity (**Figure 1S**). These results suggest that the concentrations of diosgenin and dioscin used in bi-directional transport experiment had no effect on the viability of Caco-2 cells.

**Figure 1S:** Cell viability of Caco-2 cells in response to diosgenin and dioscin (2 h treatment) as determined by MTS assay. Triton X-100 (0.25%) was used as positive control. \*\*\*  $p < 0.05$ , determined by Kruskal-Wallis test. The data shown are mean  $\pm$  SD of triplicate treatments in one experiment.

**Figure 1S**

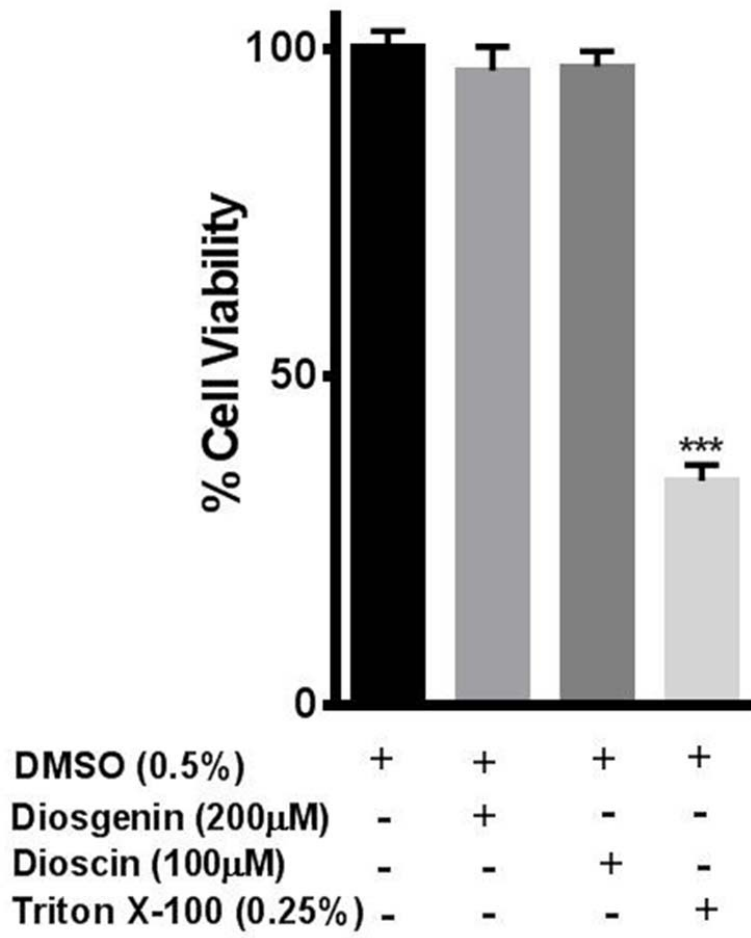

Supplement: NIHMS903011-supplement-Supporting_Information.pdf [file NIHMS903011-supplement-Supporting_Information.pdf]
